# Supplementary material
Source: PubMed Central journal article supplement (PMC5079181)
Supplement: NIHMS820085-supplement-Suppl_Fig.pdf [file NIHMS820085-supplement-Suppl_Fig.pdf]

**SUPPLEMENTARY DATA**

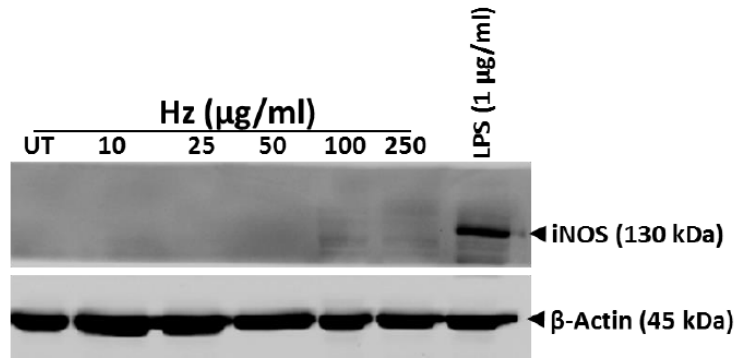

**Supplementary Figure 1. Effect of Hemozoin on iNOS production in macrophages.** Macrophages were treated with Hz for various concentration for 16 h and immunoblotted for iNOS. iNOS was not expressed upon treatment with Hz. LPS was used as positive control.
